# Supplementary material
Source: HighWire-hosted journal article supplement (https://spcare.bmj.com/content/bmjspcare-2019-001824)
Supplement: inline-supplementary-material-1 [file inline-supplementary-material-1.pdf]

**APPENDIX 1**

Keyword search terms:

advance care plan(s)

advance care planning

advance decision(s)

advance directive(s)

living will(s)

ACP

A.C.P.

A C P

A-C-P
